# Supplementary material for: Decadal change of summertime reactive nitrogen species and surface ozone over the Southeast United States
Source: Copernicus journal article supplement (doi:10.5194/acp-2017-606), 2017-07-13
Supplement: Supplementary file 1 [file acp-2017-606-supplement.pdf]

## Supplementary Material

**Table S1.** Isoprene oxidation chemistry in AM3. T represents temperature (K).

| Reactions                                                                                                                                                         | Reaction Rate                        | Note |
|-------------------------------------------------------------------------------------------------------------------------------------------------------------------|--------------------------------------|------|
| <b>Isoprene Daytime Chemistry</b>                                                                                                                                 |                                      |      |
| ISOP + OH → ISOPO2                                                                                                                                                | $3.10 \times 10^{-11} \exp(350./T)$  |      |
| ISOPO2 → 2.0*HO2 + CH2O + .333*MGLY<br>+ .5*GLYALD + 0.25*GLYX                                                                                                    | $4.07 \times 10^8 \exp(-7694./T)$    |      |
| ISOPO2 + NO → .90*NO2 + .90*HO2 + .9*CH2O<br>+ .55*MVK + 0.35*MACR + 0.1*ISOPNB                                                                                   | $2.70 \times 10^{-12} \exp(350./T)$  |      |
| ISOPO2 + HO2 → .937*ISOPOOH + .063*OH<br>+ .025*MACR + .038*MVK + .063*HO2<br>+ .063*CH2O                                                                         | $2.06 \times 10^{-13} \exp(1300./T)$ |      |
| ISOPO2 + ISOPO2 → 1.28*HO2 + .92*CH2O<br>+ .56*MVK + .36*MACR + .48*ROH + .5*HC5                                                                                  | $1.54 \times 10^{-13}$               |      |
| ISOPO2 + CH3O2 → 1.1*HO2 + 1.22*CH2O<br>+ .28*MVK + .18*MACR + .3*HC5<br>+ .24*CH3OH + .24*ROH                                                                    | $8.37 \times 10^{-14}$               |      |
| ISOPO2 + CH3CO3 → .887*HO2 + .747*CH2O<br>+ .453*MVK + .294*MACR + .14*HC5<br>+ .113*DIBOO + {CO2} + CH3O2                                                        | $1.68 \times 10^{-12} \exp(500./T)$  |      |
| ISOPO2 + CH3CO3 → MEK + CH3COOH                                                                                                                                   | $1.87 \times 10^{-13} \exp(500./T)$  |      |
| ISOPNB + OH → ISOPNB02                                                                                                                                            | $2.40 \times 10^{-12} \exp(745./T)$  |      |
| ISOPNB02 + NO → .09*GLYALD + .09*HYAC<br>+ .69*CH2O + 0.88*NO2 + .44*MACRN<br>+ .69*HO2 + .26*MVKN + 0.21*DHDN                                                    | $2.40 \times 10^{-12} \exp(360./T)$  |      |
| ISOPNB02 + HO2 → .06*GLYALD + .06*HYAC<br>+ .44*CH2O + .28*MACRN + .16*MVKN<br>+ .06*NO2 + .44*HO2 + .5*OH + .5*ISNP +<br>0.5*ROOH                                | $8.70 \times 10^{-14} \exp(1650./T)$ |      |
| ISOPNB + O3 → 0.05*HO2 + 0.05*OH +<br>0.11*MVKN + 0.32*MACRN + 0.16*HCOOH +<br>0.62*CH2O + 0.36*{CO2} + 0.21*CO +<br>0.06*C4NACID + 0.36*HPROPEN +<br>0.1*MVKN0OH | $3.70 \times 10^{-19}$               |      |
| ISNP + OH → .612*OH + .612*R4N1<br>+ .386*ISOPNB02                                                                                                                | $4.75 \times 10^{-12} \exp(200./T)$  |      |
| ISOPOOH + OH → .387*ISOPO2 + .613*OH<br>+ .613*HC5                                                                                                                | $4.75 \times 10^{-12} \exp(200./T)$  |      |
| ISOPOOH + OH → OH + IEPOX                                                                                                                                         | $1.90 \times 10^{-11} \exp(390./T)$  |      |
| IEPOX + OH → IEPOXOO                                                                                                                                              | $5.78 \times 10^{-11} \exp(-400./T)$ |      |
| IEPOXOO + HO2 → .725*HYAC<br>+ .275*GLYALD + .275*GLYX + .375*CH2O<br>+ .251*CO + .275*MGLY + 1.125*OH<br>+ .825*HO2                                              | $2.06 \times 10^{-13} \exp(1300./T)$ |      |
| IEPOXOO + NO → .725*HYAC + .275*GLYALD<br>+ .275*GLYX + .375*CH2O + .074*HCOOH                                                                                    | $2.70 \times 10^{-12} \exp(350./T)$  |      |

|                                                                                                                                            |                                       |  |
|--------------------------------------------------------------------------------------------------------------------------------------------|---------------------------------------|--|
| + .251*CO + NO2 + .275*MGLY<br>+ .125*OH+ .825*HO2                                                                                         |                                       |  |
| HC5 + OH → HC5OO                                                                                                                           | $3.35 \times 10^{-11} \exp(380./T)$   |  |
| HC5 + O3 → .6*MGLY + .1*OH + .12*CH2O<br>+ .28*GLYALD + .3*O3 + .4*CO + .2*H2<br>+ .2*HYAC + .2*HCOOH                                      | $6.16 \times 10^{-15} \exp(-1814./T)$ |  |
| HC5OO + NO → NO2 + .216*GLYX<br>+ .234*MGLY + .234*GLYALD + .09*RCHO +<br>HO2 + .09*CO + .216*HYAC + .29*DHMOB<br>+ .17*MOBA               | $2.35 \times 10^{-12} \exp(350./T)$   |  |
| HC5OO + NO → HNO3                                                                                                                          | $3.50 \times 10^{-13} \exp(350./T)$   |  |
| HC5OO + HO2 → .1*IAP + .9*OH + .9*MGLY<br>+ .9*GLYALD + .9*HO2                                                                             | $2.06 \times 10^{-13} \exp(1300./T)$  |  |
| HC5OO + CH3O2 → .5*HO2 + .33*CO + .09*H2<br>+ .18*HYAC + .25*C2H5OH + .5*HO2<br>+ .13*GLYALD + .29*MGLY<br>+ .25*MEK+ .95*CH2O + .25*CH3OH | $8.37 \times 10^{-14}$                |  |
| HC5OO + CH3CO3 → .216*GLYX + .234*MGLY<br>+ .234*GLYALD + .216*HYAC + .29*DHMOB<br>+ .17*MOBA + .09*RCHO + HO2 + .09*CO +<br>CH3O2         | $1.68 \times 10^{-12} \exp(500./T)$   |  |
| HC5OO + CH3CO3 → MEK + CH3COOH                                                                                                             | $1.87 \times 10^{-13} \exp(500./T)$   |  |
| IAP + OH → .654*OH + .654*DHMOB<br>+ .346*HC5OO                                                                                            | $5.31 \times 10^{-12} \exp(200./T)$   |  |
| MOBA + OH → MOBAOO                                                                                                                         | $2.79 \times 10^{-11} \exp(380./T)$   |  |
| MOBA + O3 → OH + HO2 + MEK                                                                                                                 | $2.00 \times 10^{-17}$                |  |
| MOBAOO + NO → RCHO + HO2 + NO2                                                                                                             | $2.35 \times 10^{-12} \exp(350./T)$   |  |
| MOBAOO + NO → HNO3                                                                                                                         | $3.50 \times 10^{-13} \exp(350./T)$   |  |
| MOBAOO + HO2 → .5*OH + .5*HO2<br>+ .5*RCHO + .5*C3H7OOH                                                                                    | $2.06 \times 10^{-13} \exp(1300./T)$  |  |
| MVK + OH → MVKOO2                                                                                                                          | $2.60 \times 10^{-12} \exp(610./T)$   |  |
| MVK + O3 → .202*OH + .202*HO2<br>+ .352*HCOOH + .535*CO + .05*CH3CHO<br>+ .95*MGLY + .05*CH2O                                              | $8.50 \times 10^{-16} \exp(-1520./T)$ |  |
| MVKOO2 + NO → .965*NO2 + .249*HO2<br>+ .249*CH2O + .716*CH3CO3 + .716*GLYALD<br>+ .249*MGLY + .035*MVKN                                    | $2.70 \times 10^{-12} \exp(350./T)$   |  |
| MVKOO2 + HO2 → .38*MVKOOH + .62*OH<br>+ .37*GLYALD + .37*CH3CO3+ .13*MEK<br>+ .25*HO2 + .12*CH2O + .12*MGLY                                | $1.82 \times 10^{-13} \exp(1300./T)$  |  |
| MVKOO2 + CH3O2 → .14*HO2 + .14*CH2O<br>+ .36*CH3CO3 + .36*GLYALD + .25*ROH<br>+ .5*HO2 + .14*MGLY + .25*MEK + .75*CH2O<br>+ .25*CH3OH      | $8.37 \times 10^{-14}$                |  |
| MVKOO2 + CH3CO3 → .4*HO2 + .4*CH2O<br>+ .6*CH3CO3 + .6*GLYALD + .4*MGLY +<br>CH3O2                                                         | $1.68 \times 10^{-12} \exp(500./T)$   |  |
| MVKOO2 + CH3CO3 → MEK + CH3COOH                                                                                                            | $1.87 \times 10^{-13} \exp(500./T)$   |  |

|                                                                                                            |                                                                                          |  |
|------------------------------------------------------------------------------------------------------------|------------------------------------------------------------------------------------------|--|
| MVKOOH + OH → .791*OH + .791*MEK<br>+ .209*MVKO2                                                           | $8.78 \times 10^{-12} \exp(200./T)$                                                      |  |
| MVKN + OH → .65*HCOOH + NO3<br>+ .65*MGLY + .35*CH2O                                                       | $1.60 \times 10^{-12}$                                                                   |  |
| MACR + OH → .45*MAO3 + .55*MACRO2                                                                          | $8.00 \times 10^{-12} \exp(380./T)$                                                      |  |
| MACR + O3 → .261*OH + .202*HO2<br>+ .326*HCOOH + .569*CO + .88*MGLY +<br>0.12*CH2O                         | $1.40 \times 10^{-15} \exp(-2100./T)$                                                    |  |
| MACR + NO3 → MAO3 + HNO3                                                                                   | $3.40 \times 10^{-15}$                                                                   |  |
| MACRO2 + HO2 → 0.42*MACROOH + 0.58*OH<br>+ 0.58*HYAC + 0.58*CO + 0.58*HO2                                  | $1.82 \times 10^{-13} \exp(1300./T)$                                                     |  |
| MACRO2 + NO3 → NO2 + HYAC + CO + HO2                                                                       | $2.30 \times 10^{-12}$                                                                   |  |
| MACRO2 + NO → .97*NO2 + 0.97*HO2 +<br>0.97*CO + 0.97*HYAC + .03*MACRN                                      | $2.70 \times 10^{-12} \exp(360./T)$                                                      |  |
| MACRO2 → CO + HYAC + OH                                                                                    | 0.5                                                                                      |  |
| MACRO2 + CH3O2 → .595*HYAC<br>+ .255*MGLY + .595*CO + 1.255*CH2O +<br>1.7*HO2 + .15*ROH                    | $8.37 \times 10^{-14}$                                                                   |  |
| MACRO2 + CH3CO3 → .85*HO2 + .143*MGLY<br>+ .857*HYAC + .857*CO + .143*CH2O + CH3O2                         | $1.68 \times 10^{-12} \exp(500./T)$                                                      |  |
| MACRO2 + CH3CO3 → MEK + CH3COOH                                                                            | $1.87 \times 10^{-13} \exp(500./T)$                                                      |  |
| MACROOH + OH → MACRO2                                                                                      | $1.84 \times 10^{-12} \exp(200./T)$                                                      |  |
| MACROOH + OH → HYAC + OH                                                                                   | $4.40 \times 10^{-12} \exp(380./T)$                                                      |  |
| MACRN + OH → MACRNO2                                                                                       | $3.20 \times 10^{-12}$                                                                   |  |
| MACRNO2 + NO → .08*CH3COOH + .08*CH2O<br>+ .07*MGLY + .85*HYAC + 1.85*NO2 +<br>0.15*NO3 + .07*HCOOH        | $2.70 \times 10^{-12} \exp(350./T)$                                                      |  |
| MACRNO2 + HO2 → .08*CH3COOH<br>+ .08*CH2O + .15*NO3 + .07*HCOOH<br>+ .07*MGLY + .85*HYAC + .85*NO2 + OH    | $1.82 \times 10^{-13} \exp(1300./T)$                                                     |  |
| MAO3 + NO → NO2 + CH2O + .65*CH3O2 +<br>0.65*CO + .35*CH3CO3                                               | $8.70 \times 10^{-12} \exp(290./T)$                                                      |  |
| MAO3 + HO2 → .44*OH + .15*O3 + .44*CH2O<br>+ .29*CH3O2 + .41*MAOP + 0.15*CH3CO3 +<br>0.15*MACO2H + 0.29*CO | $5.20 \times 10^{-13} \exp(980./T)$                                                      |  |
| MAO3 + NO3 → NO2 + 0.35*CH3CO3 + CH2O +<br>0.65*CH3O2 + 0.65*CO                                            | $4.00 \times 10^{-12}$                                                                   |  |
| MAO3 + CH3O2 → CH2O + HO2 + CH2O +<br>CH3CO3                                                               | $1.68 \times 10^{-12} \exp(500./T)$                                                      |  |
| MAO3 + CH3O2 → RCOOH + CH2O                                                                                | $1.87 \times 10^{-13} \exp(500./T)$                                                      |  |
| MAO3 + CH3CO3 → CH3O2 + CH2O + CH3CO3                                                                      | $2.50 \times 10^{-12} \exp(500./T)$                                                      |  |
| MAO3 + NO2 + M → MPAN + M                                                                                  | $k_o=9.00E-28*(300/T)^{8.90};$<br>$k_i=7.70E-12*(300/T)^{0.20};$<br>$f=0.60;$<br>$usr53$ |  |
| MPAN → MAO3 + NO2                                                                                          | $1.111 \times 10^{28} \exp(-$<br>$14000./T)*usr53$                                       |  |
| MPAN + OH → HYAC + CO + NO2                                                                                | $2.90 \times 10^{-11}$                                                                   |  |

|                                                                                                         |                                                                                                                                                                                                                       |                        |
|---------------------------------------------------------------------------------------------------------|-----------------------------------------------------------------------------------------------------------------------------------------------------------------------------------------------------------------------|------------------------|
| MPAN + O3 → NO2 + .6*CH2O + HO2                                                                         | 8.20×10 <sup>-18</sup>                                                                                                                                                                                                |                        |
| MACO2H + OH → 0.35*CH3CO3 + 0.65*CH3O2 + CH2O + 0.65*CO                                                 | 1.51×10 <sup>-11</sup>                                                                                                                                                                                                |                        |
| MAOP + OH → MAO3                                                                                        | 6.13×10 <sup>-13</sup> exp(200./T)                                                                                                                                                                                    |                        |
| MAOP + OH → MAOPO2                                                                                      | 3.60×10 <sup>-12</sup> exp(380./T)                                                                                                                                                                                    |                        |
| MAOPO2 + HO2 → HYAC + 2*OH                                                                              | 1.82×10 <sup>-13</sup> exp(1300./T)                                                                                                                                                                                   |                        |
| MAOPO2 + NO → HYAC + OH + NO2                                                                           | 2.35×10 <sup>-12</sup> exp(350./T)                                                                                                                                                                                    |                        |
| MAOPO2 + MAOPO2 → 2*HYAC + 2*OH                                                                         | 8.37×10 <sup>-14</sup>                                                                                                                                                                                                |                        |
| MAOPO2 + CH3O2 → .7*HYAC + .7*OH + CH2O + .7*HO2 + .3*C2H5OH                                            | 8.37×10 <sup>-14</sup>                                                                                                                                                                                                |                        |
| MAOPO2 + CH3CO3 → HYAC + OH + CH3O2                                                                     | 1.68×10 <sup>-12</sup> exp(500./T)                                                                                                                                                                                    |                        |
| MAOPO2 + CH3CO3 → CH3COOH + MEK                                                                         | 1.87×10 <sup>-13</sup> exp(500./T)                                                                                                                                                                                    |                        |
| GLYALD + OH → 0.2*GLYX + HO2 + 0.8*CH2O + 0.8*CO                                                        | 1.00×10 <sup>-11</sup>                                                                                                                                                                                                | MCM v3.3.1             |
| GLYX + OH → HO2 + 2*CO                                                                                  | 3.10×10 <sup>-12</sup> exp(340./T)                                                                                                                                                                                    |                        |
| GLYX + NO3 → HNO3 + HO2 + 2*CO                                                                          | k <sub>1</sub> =1.4×10 <sup>-12</sup> exp(-1860./T);<br>k <sub>1</sub> *(M*0.21+3.5×10 <sup>18</sup> )<br>/(M*0.42+3.5×10 <sup>18</sup> )                                                                             |                        |
| MGLY + OH → CH3CO3 + CO                                                                                 | 1.50×10 <sup>-11</sup>                                                                                                                                                                                                |                        |
| MGLY + NO3 → HNO3 + CO + CH3CO3                                                                         | 1.40×10 <sup>-12</sup> exp(-1860./T)                                                                                                                                                                                  |                        |
| HYAC + OH → MGLY + HO2                                                                                  | frac=1.-23.7exp(-T/70.);<br>2.15×10 <sup>-12</sup> exp(305./T)*frac                                                                                                                                                   |                        |
| HYAC + OH → .5*HCOOH + OH + .5*CH3COOH + .5*CO + .5*CH3O2                                               | 2.15×10 <sup>-12</sup> exp(305./T)*(1-frac)                                                                                                                                                                           |                        |
| <b>Isoprene Nighttime Chemistry</b>                                                                     |                                                                                                                                                                                                                       |                        |
| ISOP + NO3 → INO2                                                                                       | 3.15×10 <sup>-12</sup> exp(-450./T)                                                                                                                                                                                   |                        |
| INO2 + NO → ISN1 + NO2 + HO2                                                                            | 2.70×10 <sup>-12</sup> exp(360./T)                                                                                                                                                                                    | MCM v3.2               |
| INO2 + NO3 → ISN1 + NO2 + HO2                                                                           | 2.30×10 <sup>-12</sup>                                                                                                                                                                                                | MCM v3.2               |
| INO2 + HO2 → 0.22*MVK + 0.015*MACR + 0.235*OH + 0.235*NO2 + 0.235*CH2O + 0.77*INPN                      | 2.05×10 <sup>-13</sup> exp(1300./T)                                                                                                                                                                                   | Schwantes et al.(2015) |
| INO2 + INO2 → 2.0*ISN1 + 1.2*HO2                                                                        | 1.30×10 <sup>-12</sup>                                                                                                                                                                                                |                        |
| INPN + OH → ISN1 + OH                                                                                   | 1.03×10 <sup>-10</sup>                                                                                                                                                                                                |                        |
| ISN1 + OH → 0.52*C510O2 + 0.48*ISNOO                                                                    | 4.16×10 <sup>-11</sup>                                                                                                                                                                                                |                        |
| ISN1 + NO3 → ISNOO + HNO3                                                                               | 5.95×10 <sup>-12</sup> exp(-1860./T)                                                                                                                                                                                  |                        |
| ISN1 + O3 → 0.555*NOA + 0.52*GLYX + 0.445*MGLY + 0.075*H2O2 + 0.445*HO2 + 0.89*CO + 0.89*OH + 0.445*NO2 | 2.40×10 <sup>-17</sup>                                                                                                                                                                                                |                        |
| ISNOO + HO2 → 0.15*NC4CO2H + 0.15*O3 + 0.41*NC4CO3H + 0.44*NOA + 0.44*CO + 0.44*HO2 + 0.44*OH           | 5.20×10 <sup>-13</sup> exp(980./T)                                                                                                                                                                                    |                        |
| ISNOO + NO → NOA + CO + HO2 + NO2                                                                       | 7.50×10 <sup>-12</sup> exp(290./T)                                                                                                                                                                                    |                        |
| ISNOO + NO2 → C5PAN1                                                                                    | k <sub>0</sub> =2.7×10 <sup>-28</sup> *M*(300./T) <sup>7.1</sup> ;<br>k <sub>1</sub> =1.2×10 <sup>-11</sup> *(300./T) <sup>0.9</sup> ;<br>fc=k <sub>0</sub> /k <sub>1</sub> ;<br>fcc=0.75-1.27*log <sub>10</sub> 0.3; |                        |

|                                                                                                                                           |                                                                                                                                                                                                                                                          |                                                     |
|-------------------------------------------------------------------------------------------------------------------------------------------|----------------------------------------------------------------------------------------------------------------------------------------------------------------------------------------------------------------------------------------------------------|-----------------------------------------------------|
|                                                                                                                                           | $nfc = 10^{\frac{\log_{10} 0.3}{1 + (\log_{10} fc/fcc)^2}};$<br>$k_0 k_1 / (k_0 + k_1) * nfc$                                                                                                                                                            |                                                     |
| ISNOO + NO3 → NOA + CO + HO2 + NO2                                                                                                        | 4.00×10 <sup>-12</sup>                                                                                                                                                                                                                                   |                                                     |
| ISNOO + ISNOO → 0.6*NC4CO2H + 1.4*NOA + 1.4*CO + 1.4*HO2                                                                                  | 1.00×10 <sup>-11</sup>                                                                                                                                                                                                                                   |                                                     |
| C510O2 + HO2 → C510OOH                                                                                                                    | 2.05×10 <sup>-13</sup> exp(1300./T)                                                                                                                                                                                                                      |                                                     |
| C510O2 + NO → NO2 + NOA + GLYX + HO2                                                                                                      | 2.70×10 <sup>-12</sup> exp(360./T)                                                                                                                                                                                                                       |                                                     |
| C510O2 + NO3 → NO2 + NOA + GLYX + HO2                                                                                                     | 2.30×10 <sup>-12</sup>                                                                                                                                                                                                                                   |                                                     |
| C510O2 + C510O2 → 0.6*C510OH + 1.4*NOA + 1.4*GLYX + 1.4*HO2                                                                               | 9.20×10 <sup>-14</sup>                                                                                                                                                                                                                                   |                                                     |
| C510OH + OH → NOA + GLYX + HO2                                                                                                            | 2.69×10 <sup>-11</sup>                                                                                                                                                                                                                                   |                                                     |
| C510OOH + OH → C510O2                                                                                                                     | 2.81×10 <sup>-11</sup>                                                                                                                                                                                                                                   |                                                     |
| NC4CO2H + OH → NOA + HO2 + CO                                                                                                             | 2.16×10 <sup>-11</sup>                                                                                                                                                                                                                                   |                                                     |
| NC4CO3H + OH → ISNOO                                                                                                                      | 2.52×10 <sup>-11</sup>                                                                                                                                                                                                                                   |                                                     |
| NOA + OH → MGLY + NO2                                                                                                                     | 1.00×10 <sup>-12</sup>                                                                                                                                                                                                                                   |                                                     |
| C5PAN1 → ISNOO + NO2                                                                                                                      | $k_0 = 4.9 \times 10^{-3} M \exp(-12100./T);$<br>$k_1 = 5.4 \times 10^{16} \exp(-13830./T);$<br>$fc = k_0/k_1;$<br>$fcc = 0.75 - 1.27 * \log_{10} 0.3;$<br>$nfc = 10^{\frac{\log_{10} 0.3}{1 + (\log_{10} fc/fcc)^2}};$<br>$k_0 k_1 / (k_0 + k_1) * nfc$ |                                                     |
| C5PAN1 + OH → NOA + CO + CO + NO2                                                                                                         | 2.16×10 <sup>-11</sup>                                                                                                                                                                                                                                   |                                                     |
| <b>Isoprene Ozonolysis</b>                                                                                                                |                                                                                                                                                                                                                                                          |                                                     |
| ISOP + O3 → .325*MACR + .244*MVK + .845*CH2O + .11*H2O2 + .27*OH + .128*C3H6 + .051*CH3O2 + .522*CO + .204*HCOOH + .199*CH3CO3 + .026*HO2 | 1.00×10 <sup>-14</sup> exp(-1970./T)                                                                                                                                                                                                                     |                                                     |
| <b>Photolysis of major organic nitrates</b>                                                                                               |                                                                                                                                                                                                                                                          |                                                     |
| ISOPNB + hv → HC5 + NO2 + HO2                                                                                                             | 1.21×10 <sup>-6</sup> s <sup>-1</sup>                                                                                                                                                                                                                    | Calculated based on 24hr average of modeled results |
| MACRN + hv → NO2 + HYAC + HO2 + CO                                                                                                        | 8.48×10 <sup>-5</sup> s <sup>-1</sup>                                                                                                                                                                                                                    |                                                     |
| MVKN + hv → GLYALD + NO2 + CH3CO3                                                                                                         | 1.36×10 <sup>-5</sup> s <sup>-1</sup>                                                                                                                                                                                                                    |                                                     |
| NOA + hv → CH3CO3 + CH2O + NO2                                                                                                            | 8.48×10 <sup>-6</sup> s <sup>-1</sup>                                                                                                                                                                                                                    |                                                     |
| ISN1 + hv → NOA + 2.0*CO + 2.0*HO2                                                                                                        | 1.36×10 <sup>-4</sup> s <sup>-1</sup>                                                                                                                                                                                                                    |                                                     |
| TERPN1 + hv → NO2                                                                                                                         | 1.21×10 <sup>-6</sup> s <sup>-1</sup>                                                                                                                                                                                                                    |                                                     |
| TERPN2 + hv → NO2                                                                                                                         | 1.21×10 <sup>-6</sup> s <sup>-1</sup>                                                                                                                                                                                                                    |                                                     |

**Table S2.** Monoterpene oxidation chemistry in AM3. T represents temperature (K).

| Reactions                                                                                        | Reaction Rates<br>(molecule <sup>-1</sup> cm <sup>3</sup> s <sup>-1</sup> ) | Note                     |
|--------------------------------------------------------------------------------------------------|-----------------------------------------------------------------------------|--------------------------|
| C <sub>10</sub> H <sub>16</sub> + OH → TERPO <sub>2</sub>                                        | $1.2 \times 10^{-11} \exp(440/T)$                                           | Atkinson and Arey (2003) |
| TERPO <sub>2</sub> + NO → 0.74*NO <sub>2</sub> + 0.26*TERPN <sub>1</sub>                         | $2.7 \times 10^{-12} \exp(360/T)$                                           | Saunders et al. (2003)   |
| TERPO <sub>2</sub> + HO <sub>2</sub> → products                                                  | $2.9 \times 10^{-13} \exp(1300/T)$                                          | Saunders et al. (2003)   |
| TERPO <sub>2</sub> + TERPO <sub>2</sub> → products                                               | $1.68 \times 10^{-12} \exp(500/T)$                                          | Tyndall et al. (2001)    |
| C <sub>10</sub> H <sub>16</sub> + O <sub>3</sub> → products                                      | $5.30 \times 10^{-16} \exp(-530/T)$                                         | RCAM2                    |
| C <sub>10</sub> H <sub>16</sub> + NO <sub>3</sub> → 0.1*TERPN <sub>2</sub> + 0.9*NO <sub>2</sub> | $1.2 \times 10^{-12} \exp(490/T)$                                           | Atkinson and Arey (2003) |

**Table S3.** Hydrolysis reactions added in AM3.

| Reactions                     | Reaction Rate or Uptake Coefficient          | Note                |
|-------------------------------|----------------------------------------------|---------------------|
| GLYX → AGLYX                  | $\gamma_{\text{glyx}} = 1.0 \times 10^{-3}$  |                     |
| MGLY → AMGLY                  | $\gamma_{\text{mgly}} = 1.0 \times 10^{-7}$  |                     |
| IEPOX → AIEPOX                | $\gamma_{\text{iepoX}} = 1.0 \times 10^{-3}$ |                     |
| ISOPNB → AONJ                 | $\gamma_{\text{IN}} = 5.0 \times 10^{-3}$    | Fisher et al.(2016) |
| AONJ → HNO <sub>3</sub> + ROH | $k = 9.259 \times 10^{-5} \text{ s}^{-1}$    | Pye et al.(2015)    |

**Table S4.** Lifetimes of major nitrates from isoprene and monoterpene in AM3.

| Species in AM3      | Formation Pathways                                                               | Lifetime <sup>a</sup> |
|---------------------|----------------------------------------------------------------------------------|-----------------------|
| ISOPNB <sup>b</sup> | C <sub>5</sub> β-hydroxy nitrate from isoprene oxidation by OH                   | 1.2 (1.4)             |
| ISN1                | C <sub>5</sub> carbonyl nitrate from isoprene oxidation by NO <sub>3</sub>       | 3.6 (3.5)             |
| INPN                | C <sub>5</sub> nitrooxy hydroperoxide from isoprene oxidation by NO <sub>3</sub> | 8.5 (7.8)             |
| MVKN                | Methyl vinyl ketone nitrate from ISOPNB oxidation by OH                          | 9.6 (9.3)             |
| MACRN               | Methacrolein nitrate from ISOPNB oxidation by OH                                 | 1.5 (1.4)             |
| ISNP                | C <sub>5</sub> nitrooxy hydroperoxide from isoprene oxidation by OH              | 12 (12)               |
| PROPNN              | Propanone nitrate from oxidation of INPN and ISN1                                | 17.6 (16.2)           |
| DHDN <sup>c</sup>   | C <sub>5</sub> dihydroxy dinitrate from ISOPNB oxidation by OH                   | 11.4 (10.3)           |
| TERPN1              | Nitrate from monoterpene oxidation by OH                                         | 19.6 (18.8)           |
| TERPN2              | Nitrate from monoterpene oxidation by NO <sub>3</sub>                            | 14.1 (14.4)           |
| PAN                 |                                                                                  | 0.72 (0.66)           |
| HNO <sub>3</sub>    |                                                                                  | 16(16)                |

<sup>a</sup>Lifetimes (hr) are calculated based on the total chemical loss rate, dry and wet deposition flux of each compound during July-August of 2004; values in brackets are from July-August of 2013. It should be noted that the lifetimes listed here are 24-h average, different from estimates by Müller et al. (2014).

<sup>b</sup>The lifetime of ISOPNB includes impacts of aerosol hydrolysis.

<sup>c</sup>The lifetime of DHDN is based on dry and wet deposition since it is not removed by chemical oxidation.



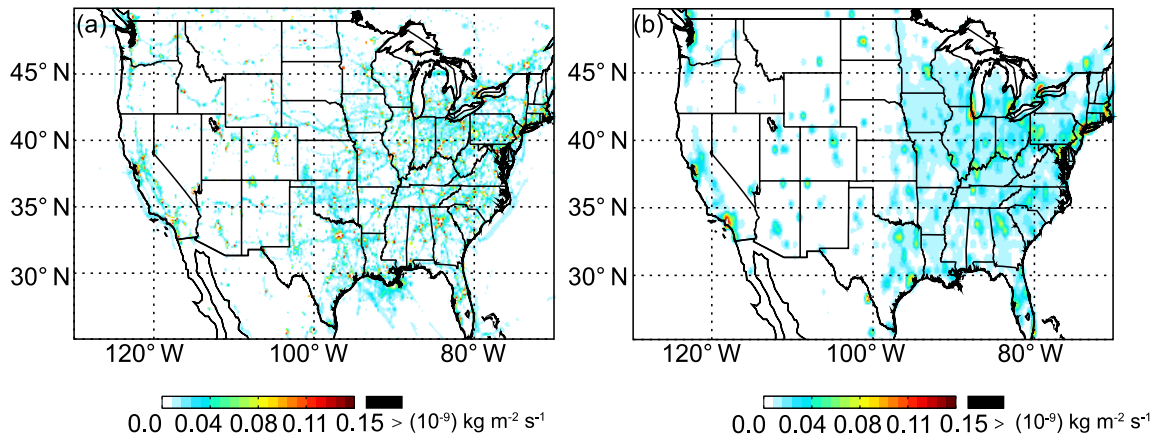

**Figure S1.** Anthropogenic NO<sub>x</sub> emission rate during July-August 2013 of (a) NEI11v1 inventory and (b) RCP8.5.

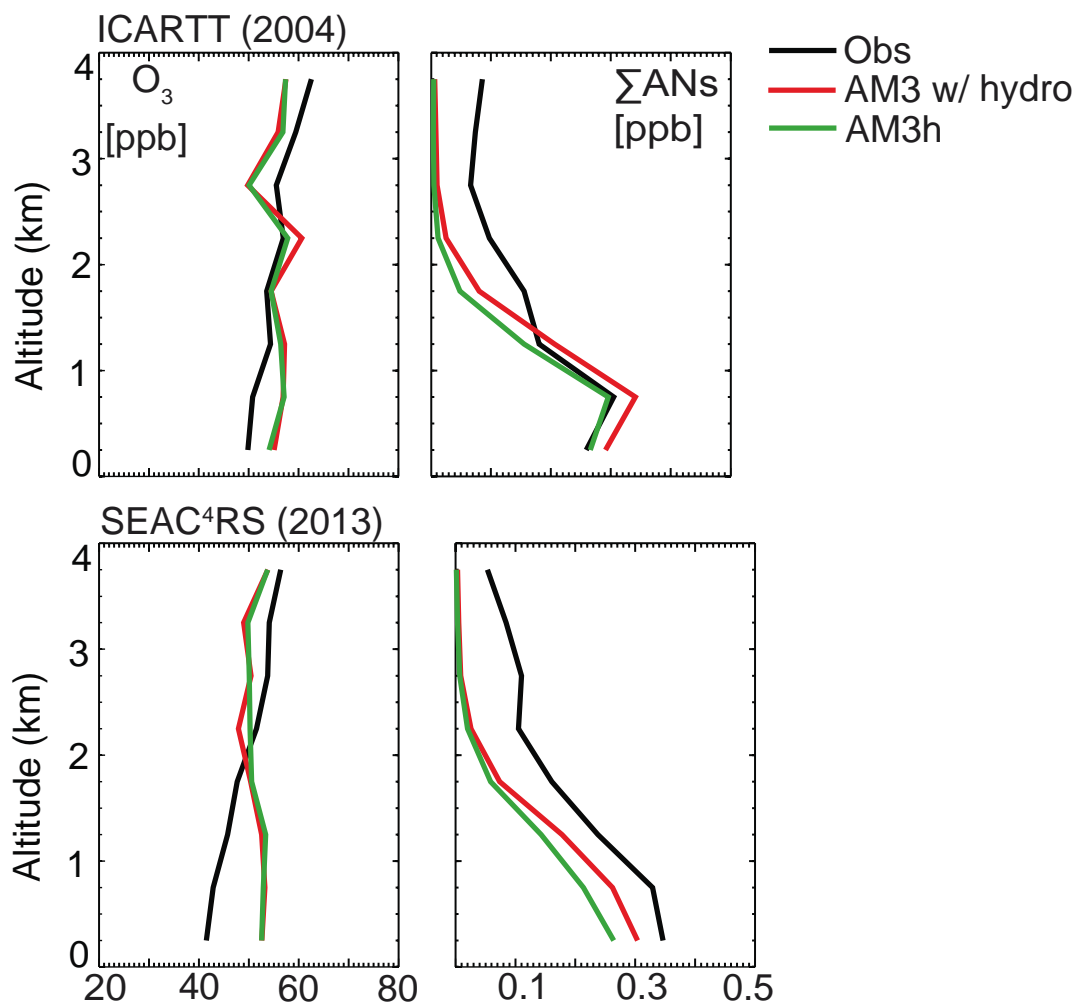

**Figure S2.** Mean vertical profiles of ozone and  $\Sigma ANs$  during ICARTT (top) and SEAC<sup>4</sup>RS (bottom). Red lines are results of AM3 with ISOPNB hydrolysis only; green lines are from AM3 with hydrolysis of ISOPNB, DHDN and TERPN1.

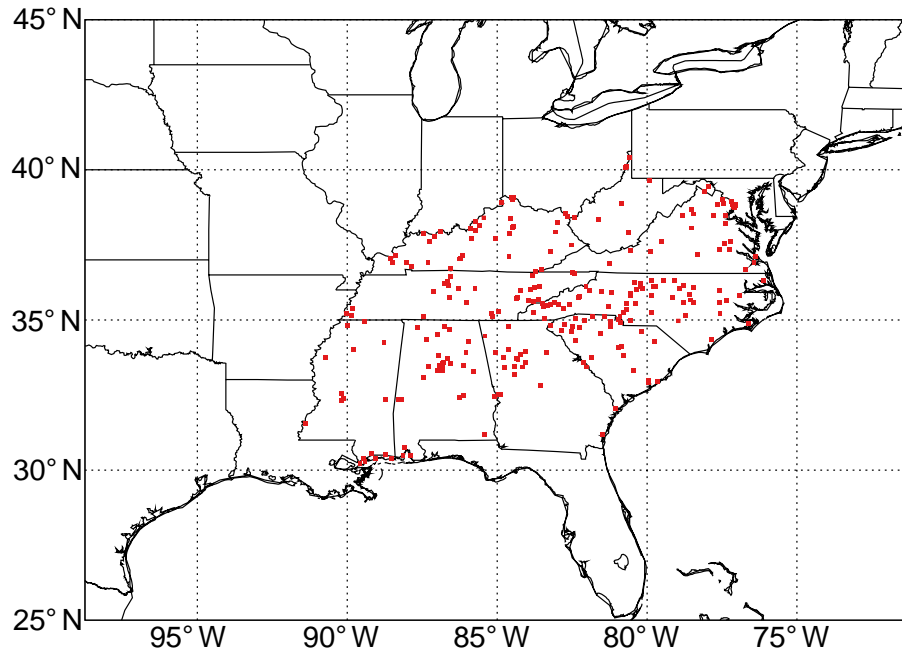

**Figure S3.** EPA AQS ozone monitoring sites in the Southeast U.S.A., from which EPA provides the MDA8 metric used in our study.

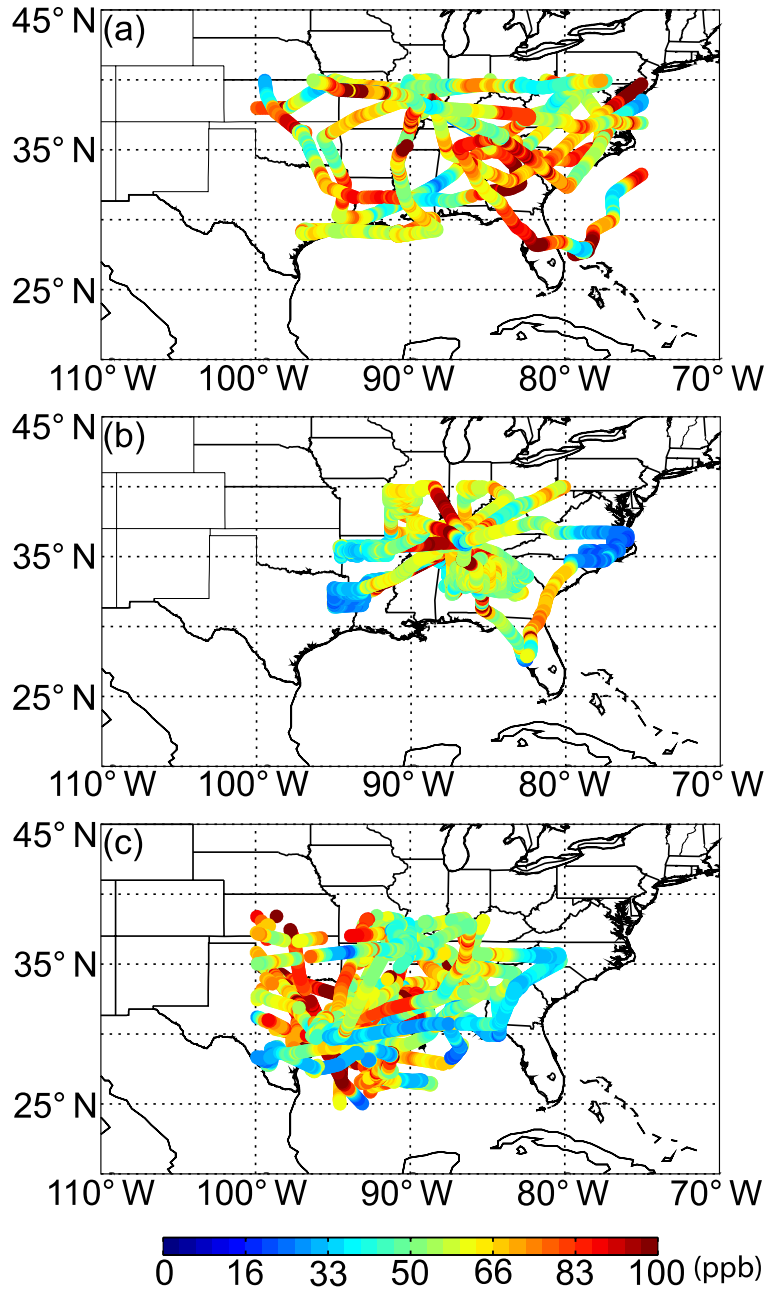

**Figure S4.** Ozone (ppb) along daytime flight tracks during (a) ICARTT (up to 12 km) (b) SENEX (up to 6 km) and (c) SEAC<sup>4</sup>RS (up to 12.5 km). Data from biomass burning, urban plumes, stratospheric air and outside of the 25-40° N latitude and 100-75° W longitude region are excluded.

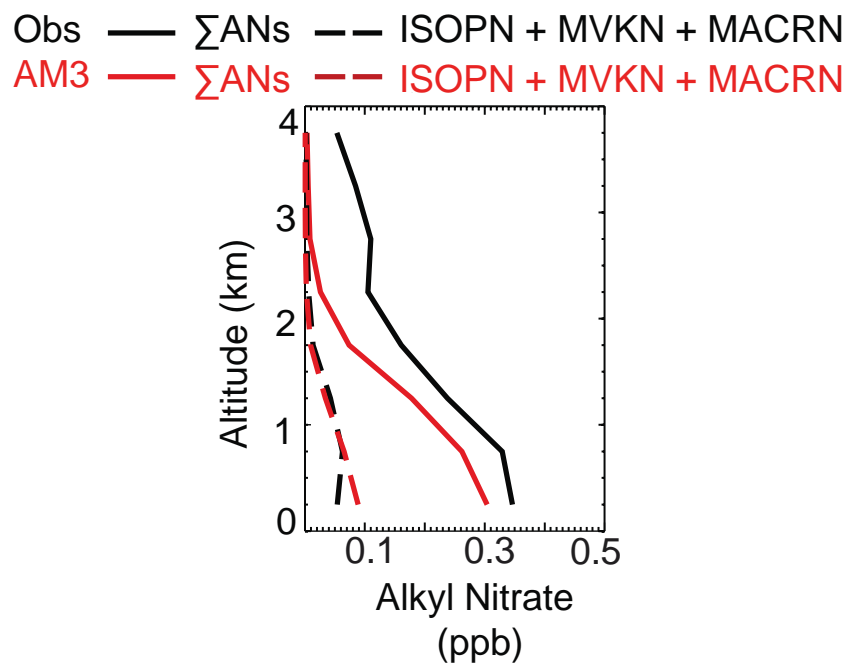

**Figure S5.** Mean vertical profiles of  $\Sigma$ ANs (solid lines) and sum of ISOPN, MVKN and MACRN (dashed lines) during SEAC<sup>4</sup>RS from observations (black) and AM3 with hydrolysis of ISOPNB (red).

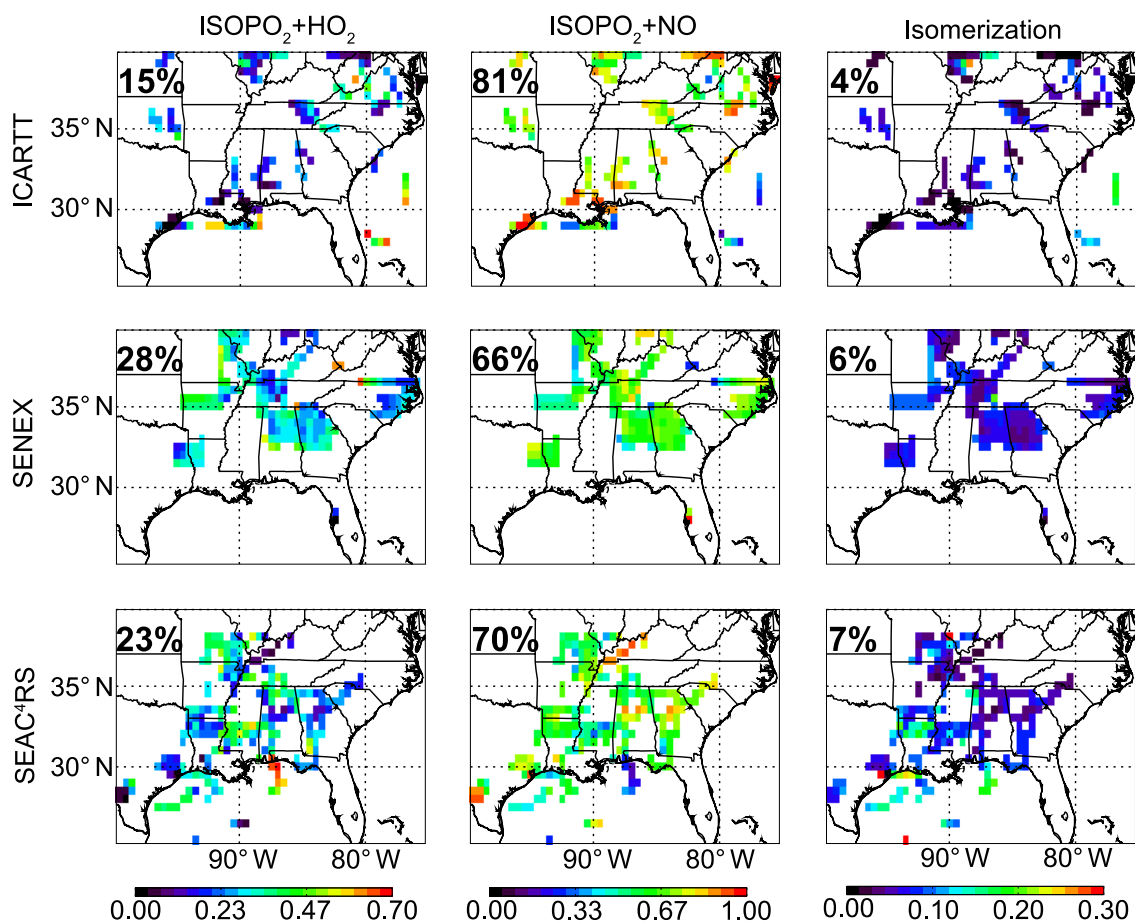

**Figure S6.** Ratio of major ISOP<sub>2</sub> loss pathways to the total ISOP<sub>2</sub> loss (sum of the three individual pathways) during ICARTT (July-August, 2004, top), SENEX (June-July, 2013, middle) and SEAC<sup>4</sup>RS (July-September, 2013, bottom) in the boundary layer (below 1.5km). Bold values in each panel are the mean percentage of each pathway to the total ISOP<sub>2</sub> loss.

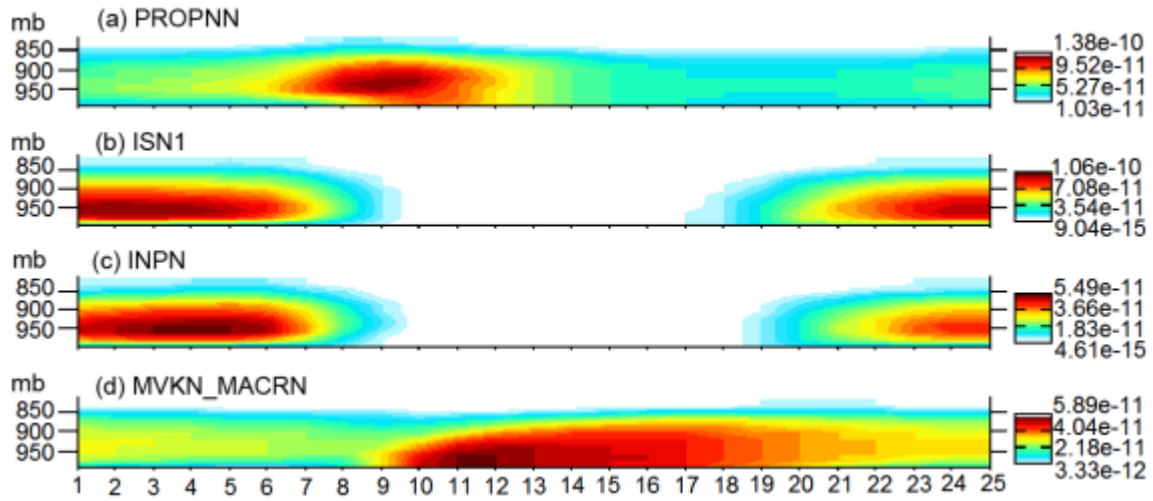

**Figure S7.** Modeled diurnal variation of PROPNN, ISN1, INPN and MVKN + MACRN (MVKN\_MACRN) in the boundary layer of the Southeast US. The x-axis is the local time, and y-axis is the pressure. Color bar indicates the concentration in volume mixing ratio.

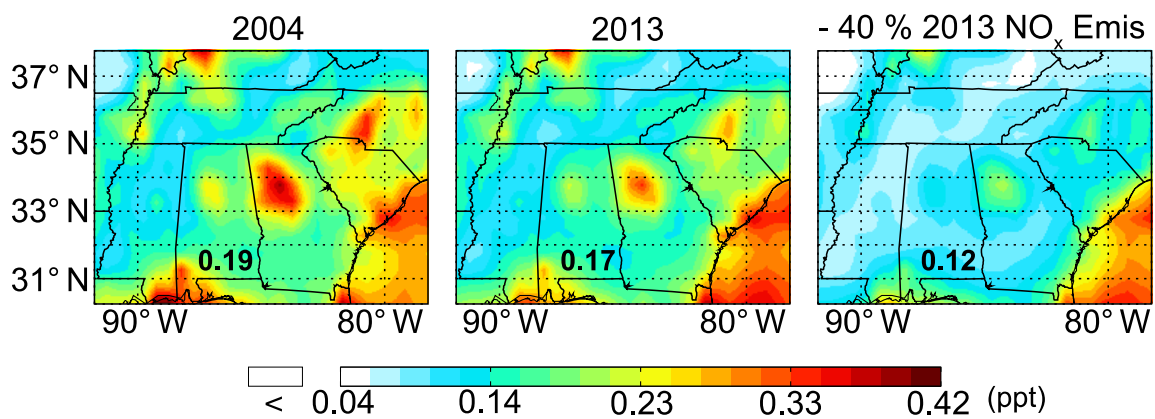

**Figure S8.** Averaged OH from 10:00 to 14:00 during July-August of 2004, 2013 in the model, and the scenario with 40% reduction in the anthropogenic NO<sub>x</sub> emissions of 2013. Bold number in each panel is the regionally-averaged OH concentration.



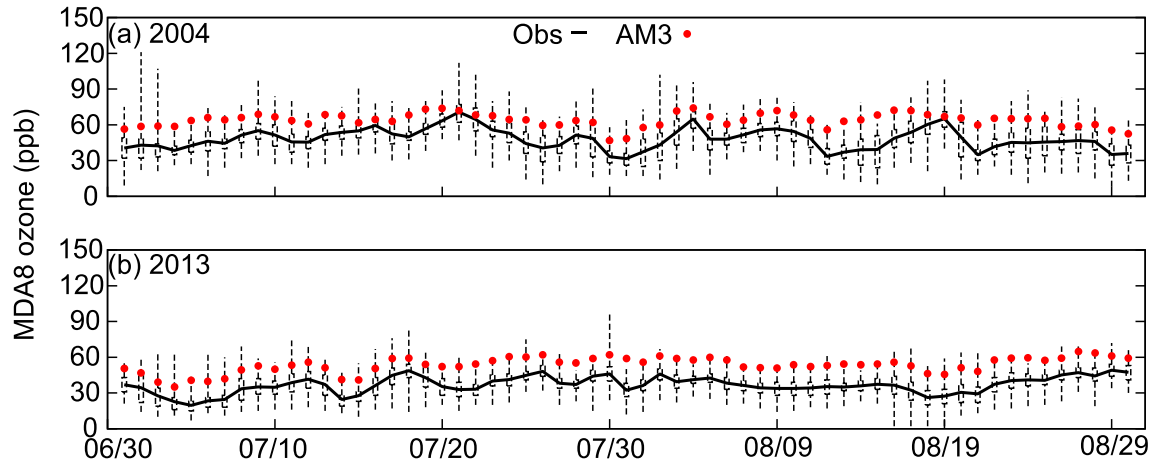

**Figure S9.** Daily MDA8 ozone during July-August of 2004 (a) and July-August of 2013 (b) averaged over 157 EPA AQS monitoring sites shown in Figure S1. Horizontal axis is month and day of the year. Black lines, dash boxes and whiskers are the mean, interquartile range and lowest and highest observations; red dots are the mean of AM3.

## References

Atkinson, R., and Arey, J.: Gas-phase tropospheric chemistry of biogenic volatile organic compounds: a review, *Atmos. Environ.*, 37, 197-219, 2003.

Fisher, J. A., Jacob, D. J., Travis, K. R., Kim, P. S., Marais, E. A., Miller, C. C., Yu, K., Zhu, L., Yantosca, R. M., and Sulprizio, M. P.: Organic nitrate chemistry and its implications for nitrogen budgets in an isoprene- and monoterpene-rich atmosphere: constraints from aircraft (SEAC4RS) and ground-based (SOAS) observations in the Southeast US, *Atmos. Chem. Phys.*, 16, 1, 1-38, 2016.

Müller, J. F., Peeters, J., and Stavrou, T.: Fast photolysis of carbonyl nitrates from isoprene, *Atmos. Chem. Phys.*, 14, 5, 2497-2508, 2014.

Pye, H. O. T., Luecken, D. J., Xu, L., Boyd, C. M., Ng, N. L., Baker, K. R., Ayres, B. R., Bash, J. O., Baumann, K., Carter, W. P. L., Edgerton, E., Fry, J. L., Hutzell, W. T., Schwede, D. B., and Shepson, P. B.: Modeling the Current and Future Roles of Particulate Organic Nitrates in the Southeastern United States, *Environ. Sci. Technol.*, 49, 24, 14195-14203, 2015.

Saunders, S. M., Jenkin, M. E., Derwent, R. G., and Pilling, M. J.: Protocol for the development of the Master Chemical Mechanism, MCM v3 (Part A): tropospheric degradation of non-aromatic volatile organic compounds, *Atmos. Chem. Phys.*, 3, 1, 161-180, 2003.

Schwantes, R. H., Teng, A. P., Nguyen, T. B., Coggon, M. M., Crouse, J. D., St. Clair, J. M., Zhang, X., Schilling, K. A., Seinfeld, J. H., and Wennberg, P. O.: Isoprene NO<sub>3</sub> Oxidation Products from the RO<sub>2</sub> + HO<sub>2</sub> Pathway, *J. Phys. Chem. A*, 119, 40, 10158-10171, 2015.

Tyndall, G., Cox, R., Granier, C., Lesclaux, R., Moortgat, G., Pilling, M., Ravishankara, A., and Wallington, T.: Atmospheric chemistry of small organic peroxy radicals, *J. Geophys. Res.*, 106, D11, 12157-12182, 2001.
